# Supplementary material for: Visual monitoring of the lysosomal pH changes during autophagy with a red-emission fluorescent probe
Source: Royal Society of Chemistry journal article supplement (doi:10.1039/c9tb02551k), 2020-01-01
Supplement: c9tb02551k1.pdf [file c9tb02551k1.pdf]

## Electronic Supplementary Information for

### Visual monitoring of the lysosomal pH changes during autophagy with a red-emission pH fluorescent probe

Xiaodong Wang<sup>†a</sup>, Li Fan<sup>\*†a</sup>, Yubin Wang<sup>b</sup>, Caihong Zhang<sup>b</sup>, Wenting Liang<sup>a</sup>,  
Shaomin Shuang<sup>b</sup> and Chuan Dong<sup>\*a</sup>

*<sup>a</sup>Institute of Environmental Science, Shanxi University, Taiyuan 030006, P. R. China*

*<sup>b</sup>College of Chemistry and Chemical Engineering, Shanxi University, Taiyuan 030006,  
P. R. China*

***\*Corresponding author:***

*dc@sxu.edu.cn; fanli128@sxu.edu.cn*

*Fax: +86-531-7011011; Tel: +86-531-7011011*

*<sup>†</sup>These authors contributed equally to this work.*

## **Contents:**

**Scheme S1 Synthetic scheme of RML and proposed sensing mechanism for pH**

**Fig. S1  $^1\text{H}$  NMR,  $^{13}\text{C}$  NMR spectra and HR-MS analysis of compound 2 and RML**

**Fig. S2 Absorption spectra changes of RML with the pH value reducing from 7.40 to 4.50**

**Fig. S3 Photostability of RML**

**Fig. S4 Cytotoxic effect of RML on HeLa cells**

**Fig. S5  $^1\text{H}$  NMR-spectra of RML at various pH values**

**Fig. S6 pH-dependent fluorescence images of RML in T98G cells**

**Fig. S7 pH-dependent fluorescence images of RML in SMMC-7721 cells**

**Fig. S8 Real-time visualization of autophagy using RML in HeLa cells**

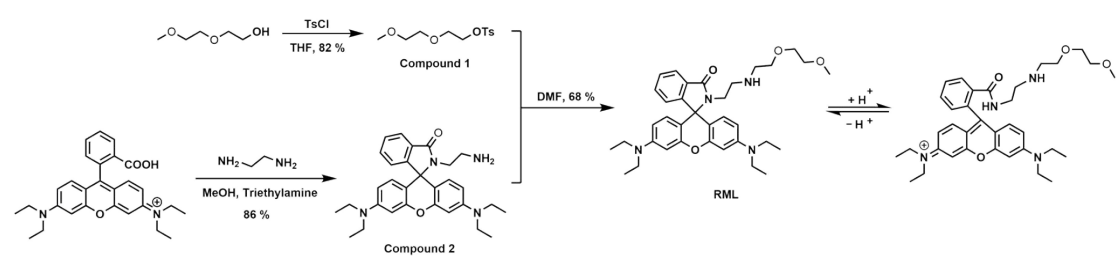

**Scheme S1** Synthetic scheme of RML and proposed sensing mechanism for pH.

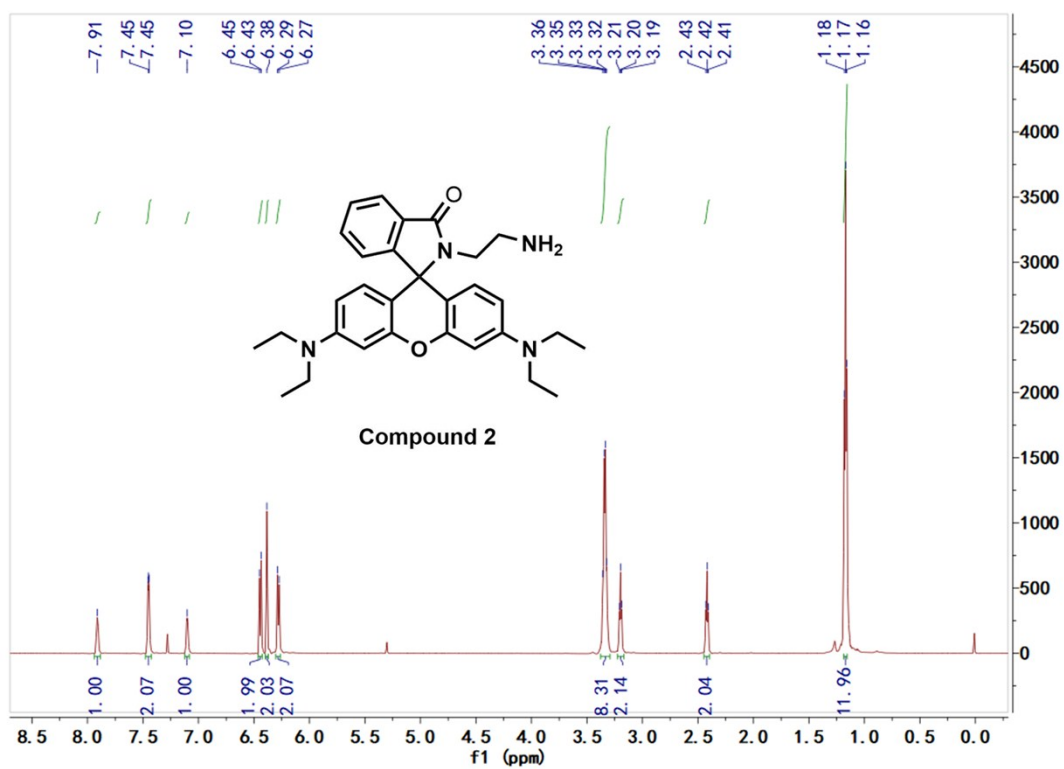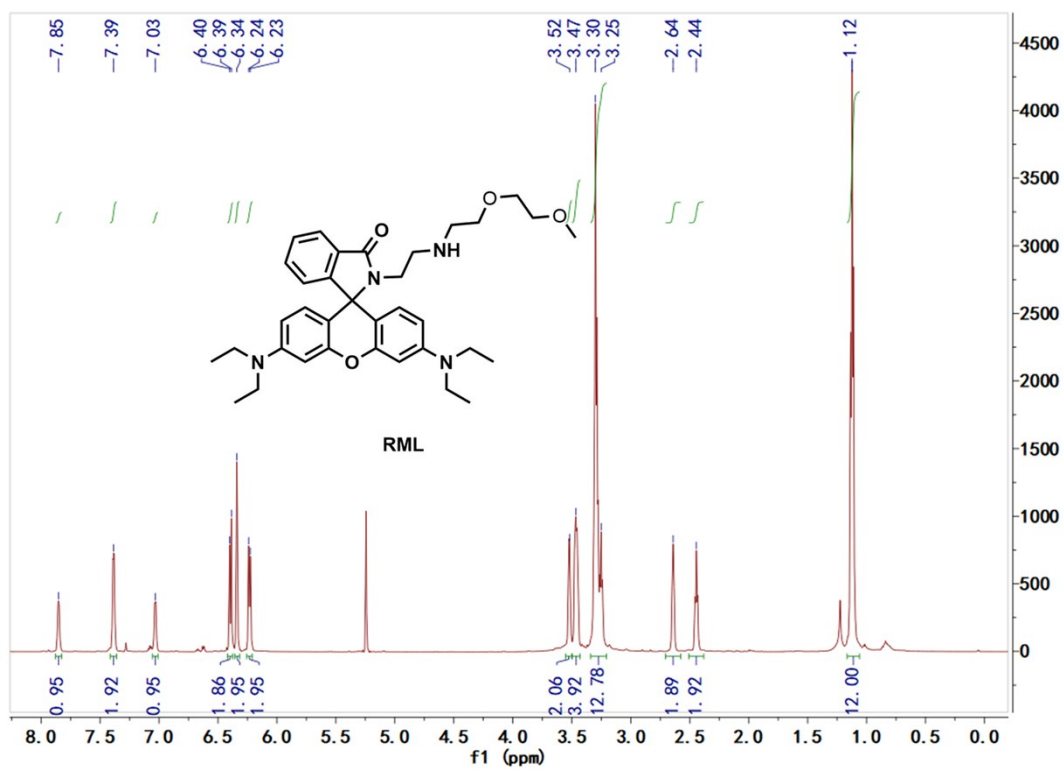

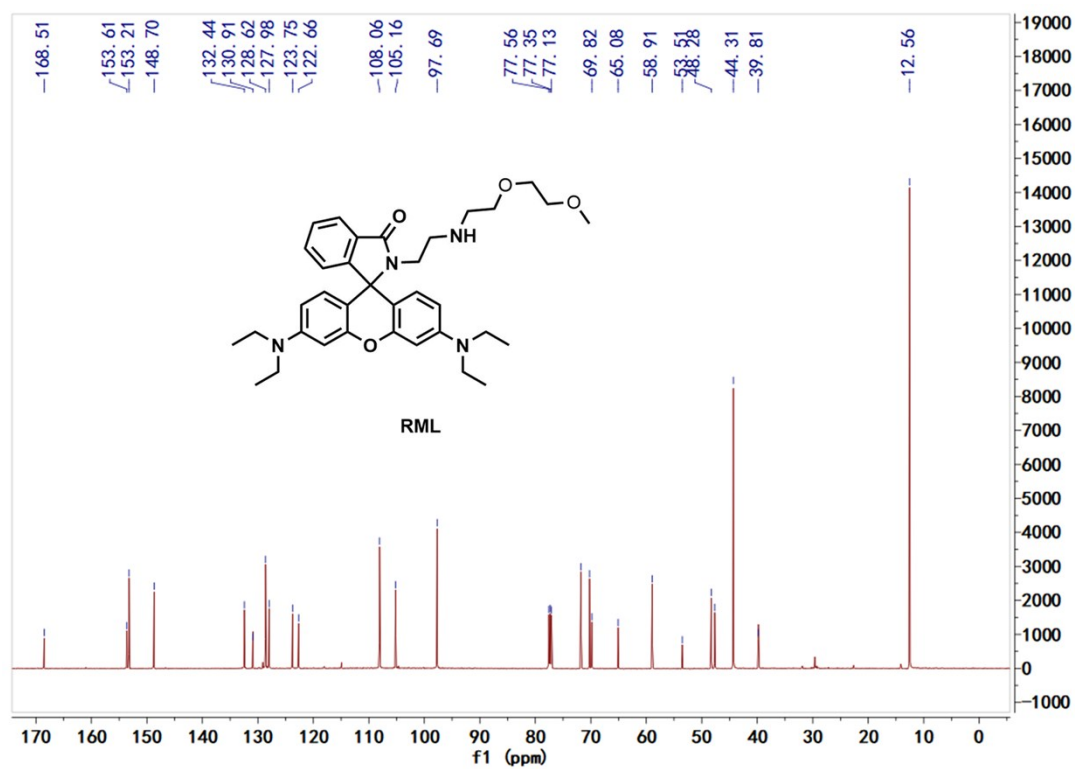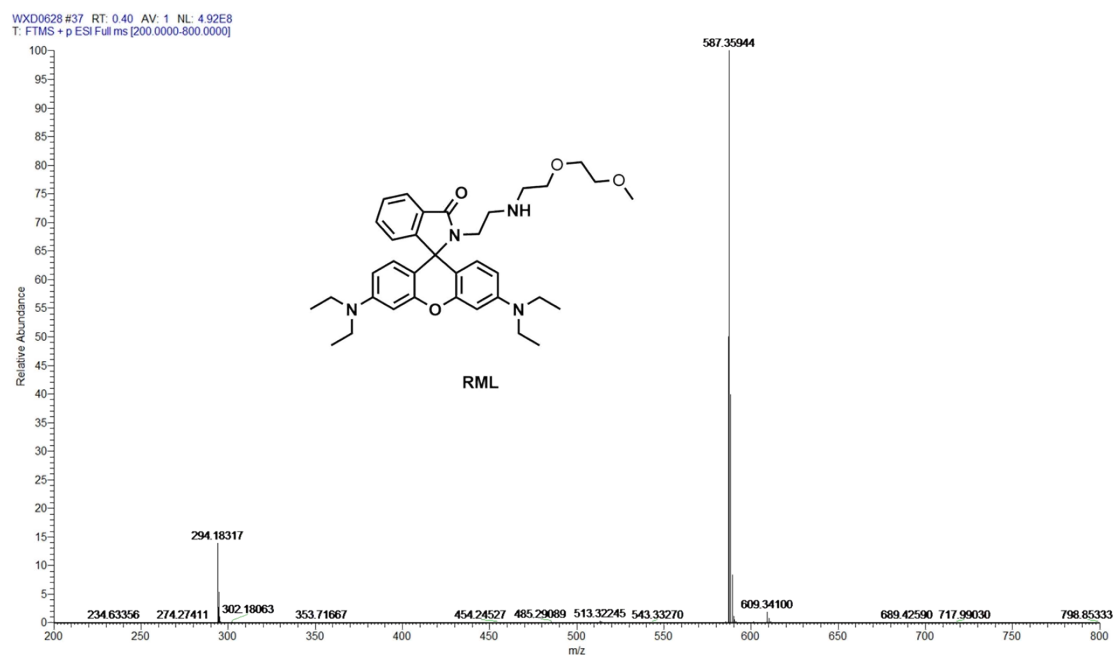

**Fig. S1** <sup>1</sup>H NMR, <sup>13</sup>C NMR spectra and HR-MS analysis of compound 2 and RML.

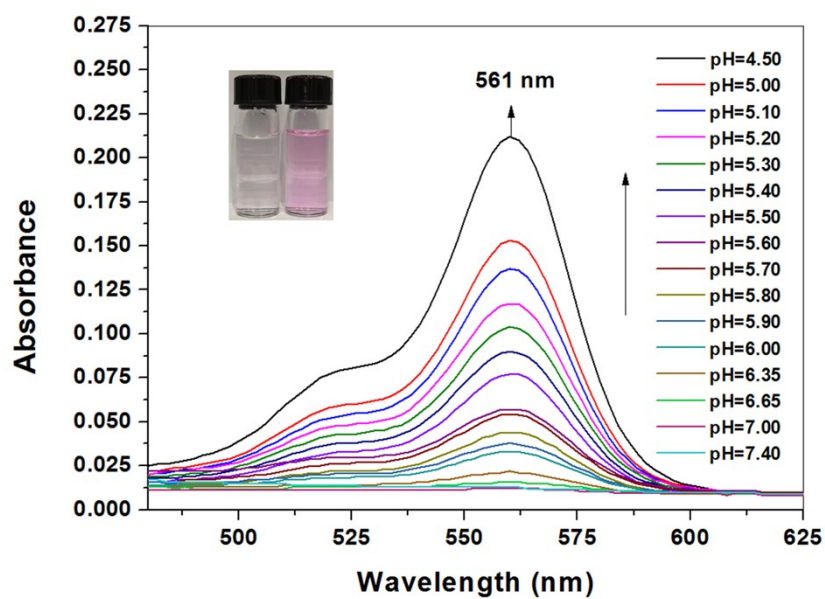

**Fig. S2** Absorption spectra changes of **RML** (25 μM) with the pH value reducing from 7.40 to 4.50. Inset: the color of solution changes from colorless to pink with the pH decreasing.

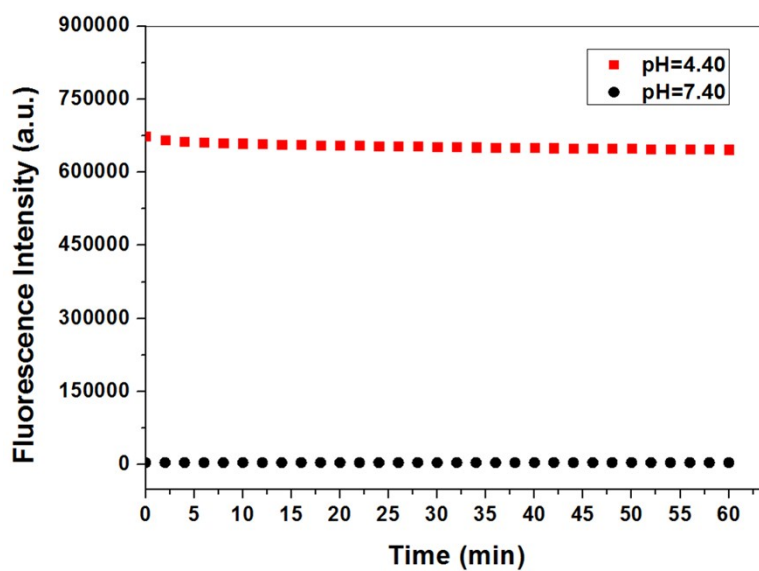

**Fig. S3** Changes in fluorescence emission of **RML** with times at pH 4.40 and 7.40, respectively. Conditions:  $\lambda_{\text{ex}} = 560 \text{ nm}$ ;  $\lambda_{\text{em}} = 583 \text{ nm}$ .

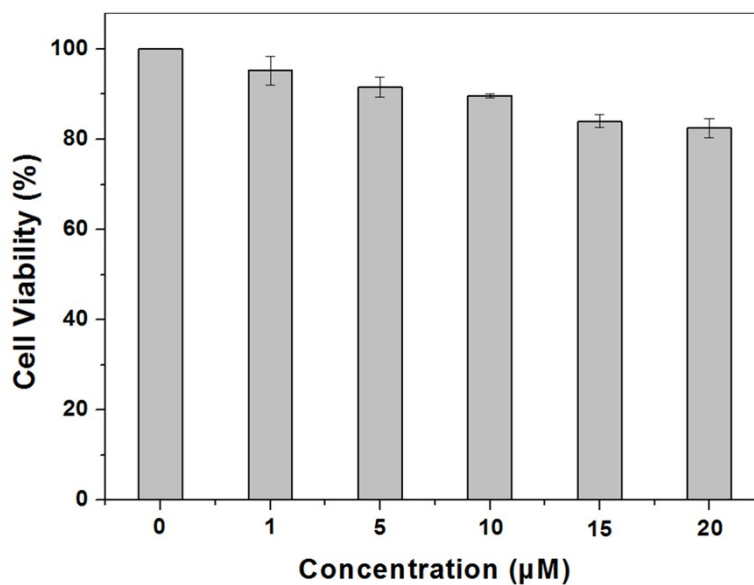

**Fig. S4** Cell viability of **RML** on HeLa cells by a standard MTT assay. 1, control; 2, 1  $\mu\text{M}$ ; 3, 5  $\mu\text{M}$ ; 4, 10  $\mu\text{M}$ ; 5, 15  $\mu\text{M}$ ; 6, 20  $\mu\text{M}$ . Data are expressed as mean values  $\pm$  standard error of the mean of three independent experiments, each performed in three triplicate.

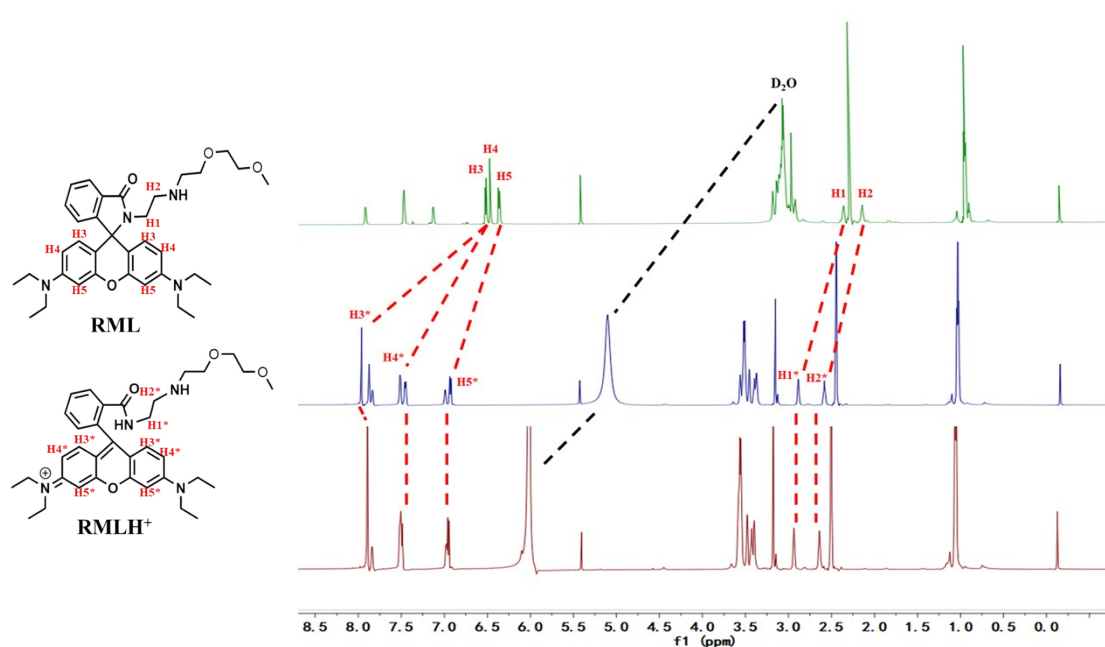

**Fig. S5**  $^1\text{H}$  NMR titration spectra of RML with decreasing pH from 7.40 (bottom) to 4.50 (top).

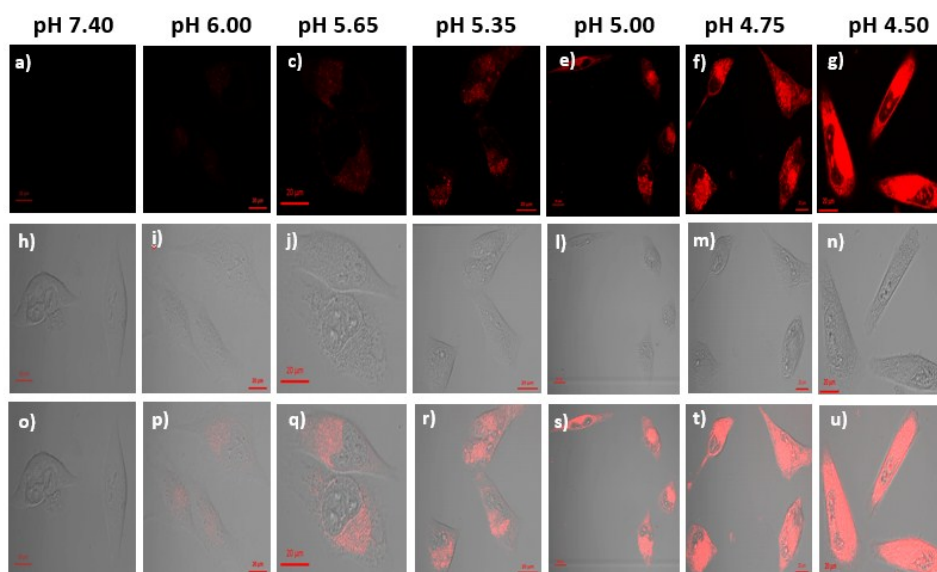

**Fig. S6** Fluorescence images of T98G cells incubated with **RML** (10  $\mu\text{M}$ ) at pH 7.40 (a), 6.00 (b), 5.65 (c), 5.35 (d), 5.00 (e), 4.75 (f) and 4.50 (g), respectively. (h-n) Bright-field cells images of a-g. (o-u) The corresponding merged cells images. The red emission was collected from 568 to 650 nm ( $\lambda_{\text{ex}} = 561$  nm). Scale bar: 20  $\mu\text{m}$ .

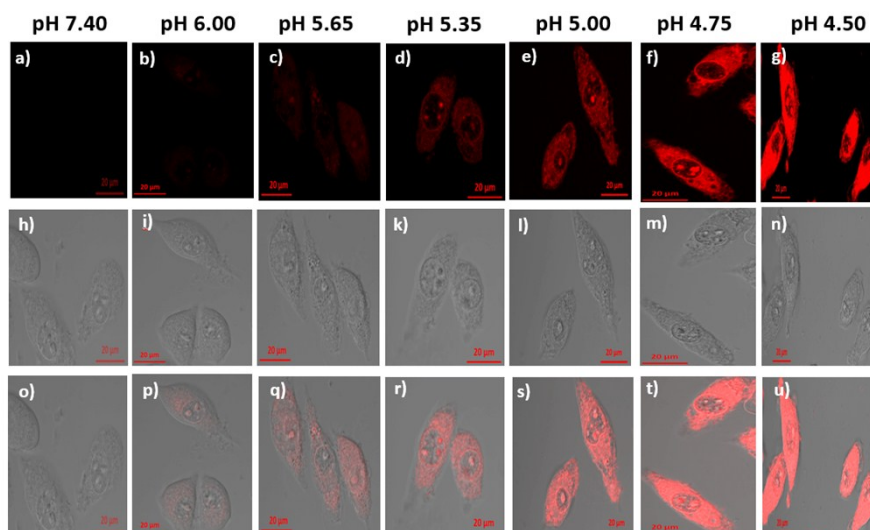

**Fig. S7** Fluorescence images of SMMC-7721 cells incubated with **RML** (10  $\mu\text{M}$ ) at pH 7.40 (a), 6.00 (b), 5.65 (c), 5.35 (d), 5.00 (e), 4.75 (f) and 4.50 (g), respectively. (h-n) Bright-field cells images of a-g. (o-u) The corresponding merged cells images. The red emission was collected from 568 to 650 nm ( $\lambda_{\text{ex}} = 561$  nm). Scale bar: 20  $\mu\text{m}$ .

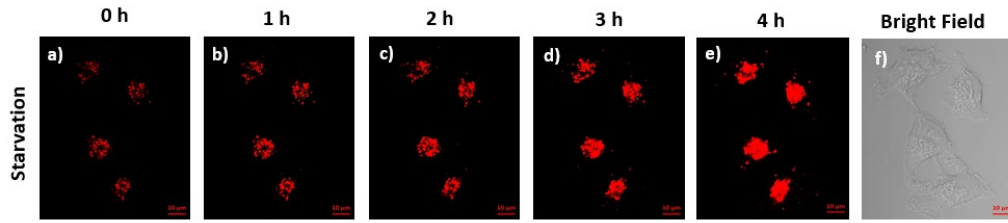

**Fig. S8** Real-time visualization of autophagy using RML in HeLa cells. (a-e) Fluorescence imaging of RML in HeLa cells were cultured under starvation conditions (medium of HBSS without bovine serum for inducing cell autophagy) for a certain time (0-4 h). Cells were incubated with RML (10  $\mu$ M) for 10 min before imaging. (f) Bright-field cells image. The red emission was collected from 568 to 650 nm ( $\lambda_{\text{ex}} = 561$  nm). Scale bar: 10  $\mu$ m.
